# Supplementary material for: A low dimensional composite of hexagonal lithium manganese borate (LiMnBO3), a cathode material for Li-ion batteries
Source: Royal Society of Chemistry journal article supplement (doi:10.1039/c4ta04209c), 2014-01-01
Supplement: c4ta04209c1.pdf [file c4ta04209c1.pdf]

**Supplementary Information for “A Low Dimensional Composite of Hexagonal Lithium Manganese Borate ( $\text{LiMnBO}_3$ ), a Cathode Material for Li-ion Batteries”**

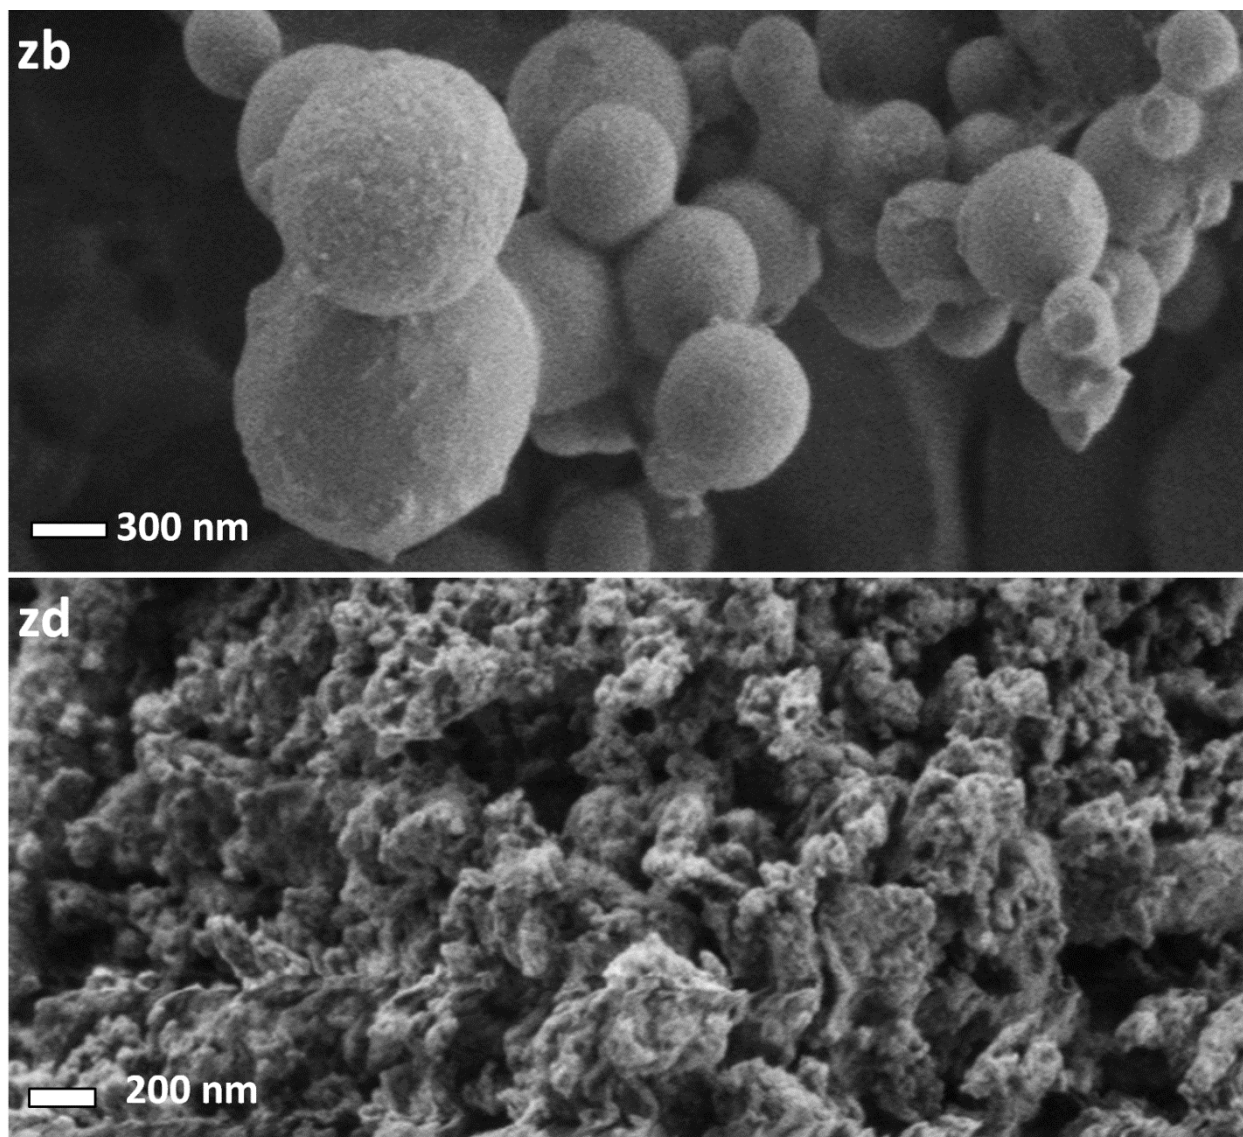

**Supplementary Figure S1.** Zoomed in regions of the scanning electron microscopy (SEM) images from the main text displaying surface morphologies: zb) amorphous nano-spheres, zd) carbon / nano h- $\text{LiMnBO}_3$  composite.

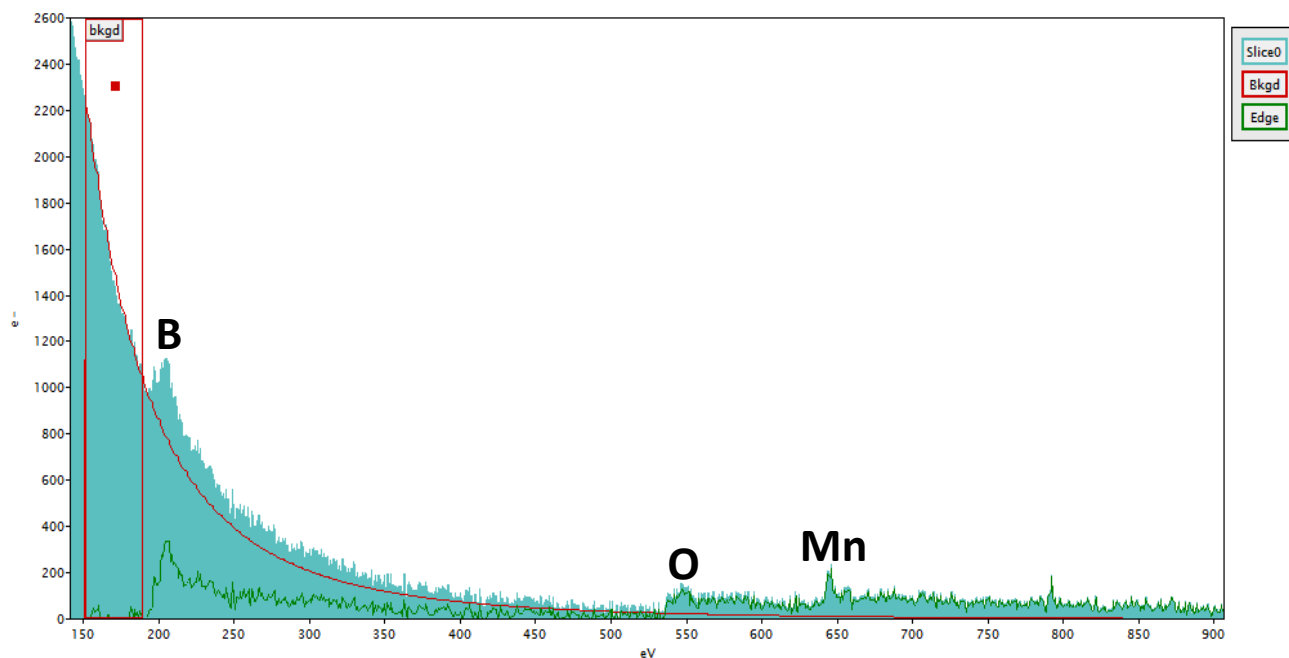

**Supplementary Figure S2.** EELS spectrum from the sample region in Figure 3a confirming the presence of Mn, B and O in amorphous nano-spheres.

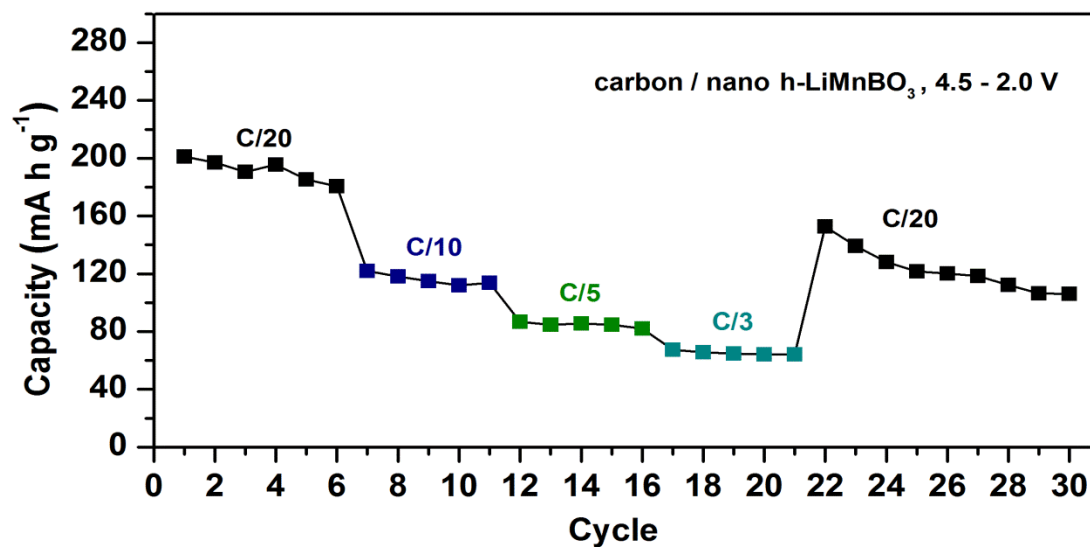

**Supplementary Figure S3.** The rate capability of carbon / nano h-LiMnBO<sub>3</sub> composite within 4.5 – 2.0 V at C/20, C/10, C/5 and C/3 rates (at room temperature).

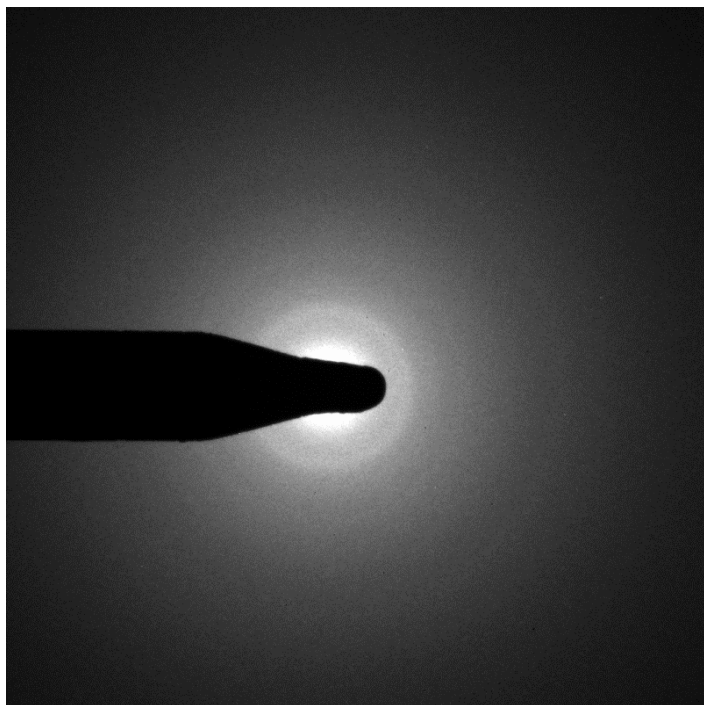

**Supplementary Figure S4.** Electron diffraction pattern of an electrode of the carbon / nano h-LiMnBO<sub>3</sub> composite in the discharged state after 50 cycles lacking any reflection further proving the amorphization of the electrode material.

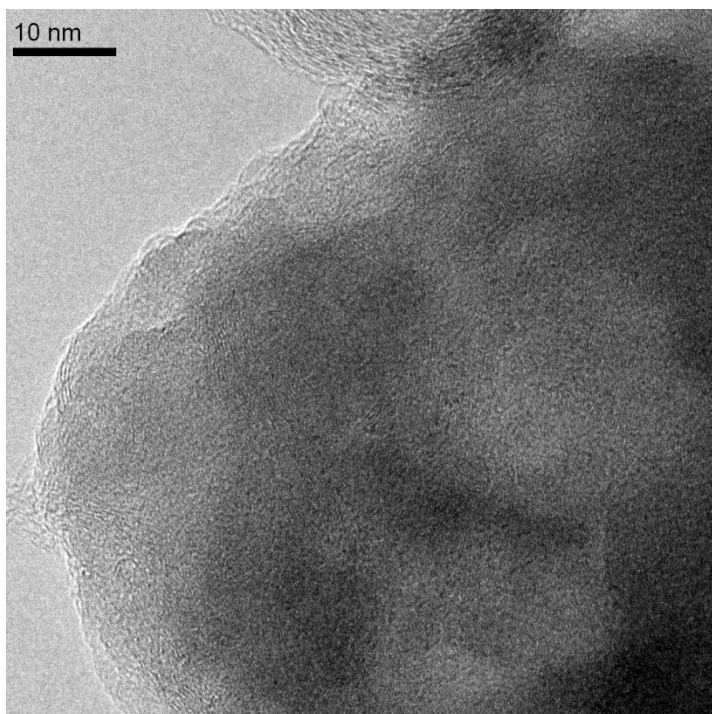

**Supplementary Figure S5.** Transmission electron microscopy image (TEM) of the cycled electrode material displaying the amorphous nature with a lack of order even at 10 nm resolution.
